# Supplementary material for: Association of Anti–Tumor Necrosis Factor Therapy With Mortality Among Veterans With Inflammatory Bowel Disease
Source: PubMed Central journal article supplement (PMC7921894; doi:10.1001/jamanetworkopen.2021.0313), 2021-03-01
Supplement: jamanetwopen-e210313-s001.pdf [file jamanetwopen-e210313-s001.pdf]

## Supplementary Online Content

Cohen-Mekelburg S, Wallace BI, Van T, et al. Association of anti-tumor necrosis factor therapy with mortality among veterans with inflammatory bowel disease.

*JAMA Netw Open.* 2021;4(3):e210313. doi:10.1001/jamanetworkopen.2021.0313

**eTable 1.** Study Medications

**eTable 2.** Prednisone-Equivalent Dosages of Systemic Corticosteroid Medications

**eTable 3.** Definitions of Covariates Used

**eTable 4.** Population Characteristics at Cohort Entry for all Included Covariates

This supplementary material has been provided by the authors to give readers additional information about their work.

**eTable 1. Study Medications**

|                            |                                                                                                                      |
|----------------------------|----------------------------------------------------------------------------------------------------------------------|
| Corticosteroid medications | Dexamethasone, betamethasone, prednisone, prednisolone, methylprednisolone, cortisone, hydrocortisone, triamcinolone |
| Anti-TNF medications       | infliximab, adalimumab, certolizumab pegol                                                                           |

TNF = tumor necrosis factor

**eTable 2.** Prednisone-Equivalent Dosages of Systemic Corticosteroid Medications

| <b>Dose</b> | <b>Glucocorticoid Name</b> |
|-------------|----------------------------|
| 0.6 mg      | Betamethasone              |
| 0.75 mg     | Dexamethasone              |
| 4 mg        | Methylprednisolone         |
| 4 mg        | Triamcinolone              |
| 5 mg        | Prednisone                 |
| 5 mg        | Prednisolone               |
| 20 mg       | Hydrocortisone             |
| 25 mg       | Cortisone                  |

**eTable 3.** Definitions of Covariates Used

Measurement indicates covariates also coded as time-varying (every 6 months).

| Covariates                                           | Definition                                                                                                                                                                                                                                                                                                                                                                                                                                                                                                                                                                                                                                                                                                                                                                                                                                                                                                                                        |
|------------------------------------------------------|---------------------------------------------------------------------------------------------------------------------------------------------------------------------------------------------------------------------------------------------------------------------------------------------------------------------------------------------------------------------------------------------------------------------------------------------------------------------------------------------------------------------------------------------------------------------------------------------------------------------------------------------------------------------------------------------------------------------------------------------------------------------------------------------------------------------------------------------------------------------------------------------------------------------------------------------------|
| Carotid artery disease                               | <b>ICD9 code 433.1</b>                                                                                                                                                                                                                                                                                                                                                                                                                                                                                                                                                                                                                                                                                                                                                                                                                                                                                                                            |
| Carotid artery disease                               | ICD9 procedure 38.12, 00.63                                                                                                                                                                                                                                                                                                                                                                                                                                                                                                                                                                                                                                                                                                                                                                                                                                                                                                                       |
| Hypercholesterolemia*^                               | ICD9 code 272.0, 272.4, 272.2                                                                                                                                                                                                                                                                                                                                                                                                                                                                                                                                                                                                                                                                                                                                                                                                                                                                                                                     |
| Osteoporosis*^                                       | ICD9 code 733                                                                                                                                                                                                                                                                                                                                                                                                                                                                                                                                                                                                                                                                                                                                                                                                                                                                                                                                     |
| Coronary artery disease                              | 410-412, 414.0-414.9 , 414.01                                                                                                                                                                                                                                                                                                                                                                                                                                                                                                                                                                                                                                                                                                                                                                                                                                                                                                                     |
| Parkinsons disease                                   | 332                                                                                                                                                                                                                                                                                                                                                                                                                                                                                                                                                                                                                                                                                                                                                                                                                                                                                                                                               |
| History of stroke^                                   | 430.x, 431.x, 433.x1, 434.x1, 435.x, 436,                                                                                                                                                                                                                                                                                                                                                                                                                                                                                                                                                                                                                                                                                                                                                                                                                                                                                                         |
| Problems with balance                                | 781.2                                                                                                                                                                                                                                                                                                                                                                                                                                                                                                                                                                                                                                                                                                                                                                                                                                                                                                                                             |
| Falls in prior 365 days                              | E880-E888                                                                                                                                                                                                                                                                                                                                                                                                                                                                                                                                                                                                                                                                                                                                                                                                                                                                                                                                         |
| DEXA scan in prior 365 days*^                        | CPT codes (pre-2006) 76075 and (post-2006) 77080                                                                                                                                                                                                                                                                                                                                                                                                                                                                                                                                                                                                                                                                                                                                                                                                                                                                                                  |
| Serious infection w/in 183 days prior to index^      | The primary hospital discharge diagnosis must be for one of the below <ul style="list-style-type: none"> <li>• Meningitis – 320.x, 049.x</li> <li>• Encephalitis – 323.x, 054.3</li> <li>• Cellulitis – 681.x, 682.x</li> <li>• Endocarditis – 421.x</li> <li>• Pneumonia – 481.x, 482.x</li> <li>• Pyelonephritis – 590.x</li> <li>• Septic arthritis – 711.0x excluding 711.08</li> <li>• Osteomyelitis – 730.0x, 730.1x, 730.2x</li> <li>• Bacteremia – 038.x, 790.7</li> </ul>                                                                                                                                                                                                                                                                                                                                                                                                                                                                |
| Opportunistic infection w/in 183 days prior to index | The primary hospital discharge diagnosis must be for infection with one of the following organisms, +/- prescription requirements as below <ul style="list-style-type: none"> <li>• Aspergillus -- 117.3 or 484.6 + prescription for posaconazole, itraconazole, or voriconazole within 90 days of the diagnosis code</li> <li>• Blastomyces (116.0), Coccidioides (114.x), Cryptococcus (117.5 or 321.0), Histoplasma (115.x): also require prescription for fluconazole, itraconazole, or voriconazole within 90 days of the diagnosis code</li> <li>• Pneumocystis (136.3)</li> <li>• Actinomyces (039.x)</li> <li>• Legionella (482.84)</li> <li>• Listeria (027.0)</li> <li>• Nocardia (defined as actinomyces)</li> <li>• Salmonella (003.x)</li> <li>• Tuberculosis: 010.x – 018.x + prescription of pyrazinamide within 90 days of diagnosis code</li> <li>• non-tuberculous mycobacteria: 031.x</li> <li>• Toxoplasma (130.x)</li> </ul> |
| Pyoderma Gangrenosum w/in 183 days prior to index    | ICD-9 686.01                                                                                                                                                                                                                                                                                                                                                                                                                                                                                                                                                                                                                                                                                                                                                                                                                                                                                                                                      |
| Stool culture w/in 183 days prior to index           | CPT 87045                                                                                                                                                                                                                                                                                                                                                                                                                                                                                                                                                                                                                                                                                                                                                                                                                                                                                                                                         |
| Diabetes                                             | 250.x, 357.2, 362.0, 362.0[1-7], 366.41, 962.3, E932.3 VA:                                                                                                                                                                                                                                                                                                                                                                                                                                                                                                                                                                                                                                                                                                                                                                                                                                                                                        |
| Hypertension                                         | 401.0-401.9                                                                                                                                                                                                                                                                                                                                                                                                                                                                                                                                                                                                                                                                                                                                                                                                                                                                                                                                       |
| Coronary artery disease^                             | 414.01                                                                                                                                                                                                                                                                                                                                                                                                                                                                                                                                                                                                                                                                                                                                                                                                                                                                                                                                            |
| Congestive heart failure^                            | 428.0 as primary dx for hospitalization,                                                                                                                                                                                                                                                                                                                                                                                                                                                                                                                                                                                                                                                                                                                                                                                                                                                                                                          |
| Blood transfusion w/in 183 days prior to index       | 36430, 36440, 36450, 36444                                                                                                                                                                                                                                                                                                                                                                                                                                                                                                                                                                                                                                                                                                                                                                                                                                                                                                                        |

|                                                                                                                            |                                                                                                                                                                                                                           |
|----------------------------------------------------------------------------------------------------------------------------|---------------------------------------------------------------------------------------------------------------------------------------------------------------------------------------------------------------------------|
| Intravenous iron w/in 183 days prior to index^                                                                             | J1439, J1756, J2916                                                                                                                                                                                                       |
| Parenteral nutrition w/in 183 days prior to index^                                                                         | S9364', 'S9365', 'S9366', 'S9367', 'S9368', 'B4164', 'B4168', 'B4172', 'B4176', 'B4178', 'B4180', 'B4185', 'B4189', 'B4193', 'B4197', 'B4199', 'B4220', 'B4222', 'B4224', 'B5000', 'B5100', 'B5200'                       |
|                                                                                                                            | ICD 9: Parenteral infusion of concentrated nutritional substances 99.15                                                                                                                                                   |
| Anemia from iron deficiency or NOS w/in 183 days prior to index*^                                                          | 280.9                                                                                                                                                                                                                     |
| Bowel Resection                                                                                                            | 17.31, 17.34, 45.61, 45.62, 45.71, 45.74, 46.02, 46.04, 48.41, 48.42, 48.43, 48.49, 48.5, 48.51, 48.52, 48.59, 48.62-69                                                                                                   |
| Ostomy                                                                                                                     | 46.1x, 46.2x, 46.3x                                                                                                                                                                                                       |
| Proctectomy Ileostomy (inpatient)                                                                                          | '4840','4842','4843','4850','4851','4852','4849','4859'                                                                                                                                                                   |
| Proctectomy Ileostomy (outpatient)                                                                                         | '44155','44156','45121','44211'                                                                                                                                                                                           |
| Fistula w/in 365 & 56 days prior to index*^<br>"procedures for fistula drainage or seton placement in the prior 365 days " | ICD 9 dx: intestinal fistula 569.81, anal fistula 565.1; '5374',<br>CPT: 46280, 46285                                                                                                                                     |
| Malnutrition                                                                                                               | 263.0, 263.1, 263.8, 263.9                                                                                                                                                                                                |
| Electrolyte abnormality                                                                                                    | 276.1, 276.8                                                                                                                                                                                                              |
| Small bowel follow-through exam w/in 365 & 56 days prior to index*^                                                        | CPT codes: 74250, 74245                                                                                                                                                                                                   |
| Other nutritional anemia (e.g. B12) w/in 183 days prior to index^                                                          | 281.9                                                                                                                                                                                                                     |
| Colonoscopy or sigmoidoscopy w/in 365 & 56 days prior to index*^                                                           | CPT codes: '44388', '44389', '44390', '44391', '44392', '44393', '44394', '45378', '45379', '45380', '45381', '45382', '45383', '45384', '45385', '45386', 'G0105', 'G0121',<br>sigmoidoscopy: 45330, 45331, 45332, 45334 |
| CT or MRI scan of abdomen/pelvis w/in 365 & 56 days prior to index*^                                                       | 74176, 74177, 74178                                                                                                                                                                                                       |
| C difficile w/in 183 & 56 days prior to index^                                                                             | ICD9 code 008.45                                                                                                                                                                                                          |
| Quinolone Rx w/in 183 days prior to index*^                                                                                |                                                                                                                                                                                                                           |
| Metronidazole Rx w/in 183 days prior to index*^                                                                            |                                                                                                                                                                                                                           |
| Other Antibiotic Rx w/in 183 days prior to index*^                                                                         |                                                                                                                                                                                                                           |
| Herpes Antiviral Rx w/in 183 days prior to index^                                                                          | acyclovir, valacyclovir, famciclovir                                                                                                                                                                                      |
| Antifungal Rx w/in 183 days prior to index^                                                                                | VA drug class AM700                                                                                                                                                                                                       |
| Mesalamine Rx w/in 183 days prior to index*^                                                                               |                                                                                                                                                                                                                           |
| AZA/6MP Rx w/in 183 days prior to index*^                                                                                  |                                                                                                                                                                                                                           |
| Methotrexate Rx w/in 183 days prior to index^                                                                              |                                                                                                                                                                                                                           |
| Narcotics Rx (excluding Belladonna/Opium) w/in 183 days prior to index*^                                                   | Dihydrocodeine<br>Fentanyl<br>Hydrocodone<br>Hydromorphone<br>Meperidine<br>Morphine<br>Oxycodone<br>Oxymorphone<br>Pentazocine<br>Propoxyphene<br>Tapentadol<br>Tramadol                                                 |

|                                                                              |                                                                                                                                                               |
|------------------------------------------------------------------------------|---------------------------------------------------------------------------------------------------------------------------------------------------------------|
| PPI Rx w/in 183 days prior to index*^                                        | esomeprazole, pantoprazole, lansoprazole, rabeprazole, omeprazole, dexlansoprazole, prilosec, prevacid, nexium, kapidex, zegerid, dexilant, protonix, aciphex |
| Benzodiazepine Rx w/in 183 days prior to index*^                             |                                                                                                                                                               |
| Bisphosphonate Rx w/in 183 days prior to index*^                             | ZOLEDRONIC ACID, etidronate, alendronate, risedronate, tiludronate                                                                                            |
| High dose Vitamin D Rx w/in 183 days prior to index                          | VA drug class VT500                                                                                                                                           |
| Statins Rx w/in 183 days prior to index*^                                    | atorvastatin, fluvastatin, lovastatin, pitavastatin, pravastatin, rosuvastatin, simvastatin, lipitor, zocor, mevacor                                          |
| Fibrates Rx w/in 183 days prior to index^                                    | fenofibrate, gemfibrozil                                                                                                                                      |
| Prednisone use in 183 days prior to index*                                   |                                                                                                                                                               |
| Budesonide use in 183 days prior to index*                                   |                                                                                                                                                               |
| Number of non-IBD medication classes taking during 183 days prior to index*^ | (excl IM600, GA400, MS190)                                                                                                                                    |
| Hypovolemia or dehydration                                                   | 276.52, 276.51                                                                                                                                                |

**eTable 4.** Population Characteristics at Cohort Entry for all Included Covariates

All covariates are assessed over the 12 months prior to enrollment. Standardized mean differences between new anti-TNF and prolonged corticosteroid (CS) users before (raw) and after (adjusted) baseline propensity weighting (weighted).

|                                            | Crohn's Disease |            |        |          | Ulcerative Colitis |            |        |          |
|--------------------------------------------|-----------------|------------|--------|----------|--------------------|------------|--------|----------|
|                                            | TNF             | CS         | SMD    |          | TNF                | CS         | SMD    |          |
|                                            |                 |            | Raw    | Weighted |                    |            | Raw    | Weighted |
| <b>Age (%)</b>                             |                 |            | 0.5539 | 0.2745   |                    |            | 0.3766 | 0.2335   |
| [18,35]                                    | 323 (36.9)      | 179 (20.8) |        |          | 98 (34.3)          | 216 (22.1) |        |          |
| [35,50]                                    | 223 (25.5)      | 150 (17.5) |        |          | 62 (21.7)          | 190 (19.4) |        |          |
| [50,65]                                    | 202 (23.1)      | 280 (32.6) |        |          | 63 (22.0)          | 296 (30.3) |        |          |
| [65,70]                                    | 77 ( 8.8)       | 102 (11.9) |        |          | 32 (11.2)          | 103 (10.5) |        |          |
| [70,75]                                    | 25 ( 2.9)       | 60 ( 7.0)  |        |          | 17 ( 5.9)          | 67 ( 6.9)  |        |          |
| [75,80]                                    | 16 ( 1.8)       | 38 ( 4.4)  |        |          | 9 ( 3.1)           | 46 ( 4.7)  |        |          |
| [80,85]                                    | 5 ( 0.6)        | 34 ( 4.0)  |        |          | 3 ( 1.0)           | 41 ( 4.2)  |        |          |
| [85,110]                                   | 4 ( 0.5)        | 16 ( 1.9)  |        |          | 2 ( 0.7)           | 18 ( 1.8)  |        |          |
| <b>Race (%)</b>                            |                 |            | 0.1780 | 0.1801   |                    |            | 0.1019 | 0.0749   |
| Black                                      | 115 (13.1)      | 84 ( 9.8)  |        |          | 20 ( 7.0)          | 95 ( 9.7)  |        |          |
| Other                                      | 26 ( 3.0)       | 18 ( 2.1)  |        |          | 9 ( 3.1)           | 33 ( 3.4)  |        |          |
| Unknown                                    | 61 ( 7.0)       | 95 (11.1)  |        |          | 30 (10.5)          | 104 (10.6) |        |          |
| White                                      | 673 (76.9)      | 662 (77.1) |        |          | 227 (79.4)         | 745 (76.3) |        |          |
| <b>Calendar year at index date (%)</b>     |                 |            | 0.5546 | 0.0069   |                    |            | 0.7245 | 0.1247   |
| 2007                                       | 35 ( 4.0)       | 116 (13.5) |        |          | 8 ( 2.8)           | 100 (10.2) |        |          |
| 2008                                       | 57 ( 6.5)       | 123 (14.3) |        |          | 8 ( 2.8)           | 106 (10.8) |        |          |
| 2009                                       | 80 ( 9.1)       | 100 (11.6) |        |          | 15 ( 5.2)          | 113 (11.6) |        |          |
| 2010                                       | 84 ( 9.6)       | 110 (12.8) |        |          | 23 ( 8.0)          | 138 (14.1) |        |          |
| 2011                                       | 112 (12.8)      | 93 (10.8)  |        |          | 29 (10.1)          | 120 (12.3) |        |          |
| 2012                                       | 135 (15.4)      | 108 (12.6) |        |          | 35 (12.2)          | 121 (12.4) |        |          |
| 2013                                       | 152 (17.4)      | 111 (12.9) |        |          | 70 (24.5)          | 130 (13.3) |        |          |
| 2014                                       | 220 (25.1)      | 98 (11.4)  |        |          | 98 (34.3)          | 149 (15.3) |        |          |
| <b>Male (%)</b>                            | 765 (87.4)      | 779 (90.7) | 0.1045 | 0.1019   | 262 (91.6)         | 919 (94.1) | 0.0953 | 0.0348   |
| <b>Anemia by iron deficiency = yes (%)</b> | 65 ( 7.4)       | 54 ( 6.3)  | 0.0452 | 0.1071   | 20 ( 7.0)          | 57 ( 5.8)  | 0.0473 | 0.0274   |
| <b>Problems with balance = yes (%)</b>     | 1 ( 0.1)        | 5 ( 0.6)   | 0.0795 | 0.0035   | 2 ( 0.7)           | 7 ( 0.7)   | 0.002  | 0.0100   |
| <b>Blood transfusion = yes (%)</b>         | 3 ( 0.3)        | 3 ( 0.3)   | 0.0011 | 0.0086   | 2 ( 0.7)           | 11 ( 1.1)  | 0.0449 | 0.0502   |
| <b>Congestive heart failure = yes (%)</b>  | 5 ( 0.6)        | 16 ( 1.9)  | 0.1047 | 0.0591   | 1 ( 0.3)           | 22 ( 2.3)  | 0.0432 | 0.0953   |
| <b>Coronary artery disease = yes (%)</b>   | 43 ( 4.9)       | 73 ( 8.5)  | 0.1437 | 0.1006   | 20 ( 7.0)          | 97 ( 9.9)  | 0.1056 | 0.1076   |
| <b>Colonoscopy or sigmoidoscopy (%)</b>    |                 |            | 0.1735 | 0.1966   |                    |            | 0.204  | 0.2704   |
| none                                       | 564 (64.5)      | 558 (65.0) |        |          | 169 (59.1)         | 530 (54.2) |        |          |

|                                              |            |            |        |         |            |            |         |         |
|----------------------------------------------|------------|------------|--------|---------|------------|------------|---------|---------|
| w/in 56 days prior                           | 123 (14.1) | 78 (9.1)   |        |         | 52 (18.2)  | 140 (14.3) |         |         |
| w/in 57-365 days prior                       | 188 (21.5) | 223 (26.0) |        |         | 65 (22.7)  | 307 (31.4) |         |         |
| <b>C. difficile (%)</b>                      |            |            | 0.0406 | 0.0865  |            |            | 0.085   | 0.0729  |
| <b>none</b>                                  | 858 (98.1) | 844 (98.3) |        |         | 276 (96.5) | 928 (95.0) |         |         |
| w/in 56 days prior                           | 8 (0.9)    | 5 (0.6)    |        |         | 4 (1.4)    | 15 (1.5)   |         |         |
| w/in 57-365 days prior                       | 9 (1.0)    | 10 (1.2)   |        |         | 6 (2.1)    | 34 (3.5)   |         |         |
| <b>CT scan or MRI (%)</b>                    |            |            | 0.1840 | 0.0880  |            |            | 0.0968  | 0.1255  |
| <b>none</b>                                  | 692 (79.1) | 733 (85.3) |        |         | 264 (92.3) | 880 (90.1) |         |         |
| w/in 56 days prior                           | 97 (11.1)  | 54 (6.3)   |        |         | 10 (3.5)   | 35 (3.6)   |         |         |
| w/in 57-365 days prior                       | 86 (9.8)   | 72 (8.4)   |        |         | 12 (4.2)   | 62 (6.3)   |         |         |
| <b>Diabetes = yes (%)</b>                    | 80 (9.1)   | 101 (11.8) | 0.0856 | 0.0210  | 31 (10.8)  | 137 (14.0) | 0.0966  | 0.0467  |
| <b>DEXA scan = yes (%)</b>                   | 56 (6.4)   | 66 (7.7)   | 0.0502 | 0.0709  | 12 (4.2)   | 64 (6.6)   | 0.1046  | 0.0914  |
| <b>Dehydration = yes (%)</b>                 | 19 (2.2)   | 30 (3.5)   | 0.0797 | 0.0477  | 16 (5.6)   | 58 (5.9)   | 0.0147  | 0.0931  |
| <b>Falls = yes (%)</b>                       | 16 (1.8)   | 29 (3.4)   | 0.0973 | 0.0450  | 7 (2.4)    | 25 (2.6)   | 0.0071  | 0.1079  |
| <b>Fistula (%)</b>                           |            |            | 0.2314 | 0.0605  |            |            | 0.0952  | <0.0001 |
| <b>none</b>                                  | 804 (91.9) | 833 (97.0) |        |         | 285 (99.7) | 976 (99.9) |         |         |
| w/in 56 days prior                           | 36 (4.1)   | 9 (1.0)    |        |         | 0 (0.0)    | 1 (0.1)    |         |         |
| w/in 57-365 days prior                       | 35 (4.0)   | 17 (2.0)   |        |         | 1 (0.3)    | 0 (0.0)    |         |         |
| <b>Hypercholesterolemia = yes (%)</b>        | 140 (16.0) | 184 (21.4) | 0.1393 | 0.1479  | 63 (22.0)  | 283 (29.0) | 0.1597  | 0.049   |
| <b>Hypertension = yes (%)</b>                | 175 (20.0) | 265 (30.8) | 0.2511 | 0.1439  | 75 (26.2)  | 322 (33.0) | 0.1479  | 0.0306  |
| <b>IV iron = yes (%)</b>                     | 6 (0.7)    | 5 (0.6)    | 0.0131 | 0.0003  | 4 (1.4)    | 2 (0.2)    | 0.1342  | 0.0069  |
| <b>Small bowel follow through (%)</b>        |            |            | 0.0478 | <0.0001 |            |            | <0.0001 | <0.0001 |
| <b>none</b>                                  | 801 (91.5) | 744 (86.6) |        |         | 285 (99.7) | 957 (98.0) |         |         |
| w/in 56 days prior                           | 19 (2.2)   | 31 (3.6)   |        |         | 0 (0.0)    | 3 (0.3)    |         |         |
| w/in 57-365 days prior                       | 55 (6.3)   | 84 (9.8)   |        |         | 1 (0.3)    | 17 (1.7)   |         |         |
| <b>Stool culture = yes (%)</b>               | 9 (1.0)    | 27 (3.1)   | 0.1484 | 0.0805  | 13 (4.5)   | 65 (6.7)   | 0.0918  | 0.0198  |
| <b>Osteoporosis = yes (%)</b>                | 0 (0.0)    | 0 (0.0)    | -      | -       | 0 (0.0)    | 0 (0.0)    | -       | -       |
| <b>Opportunistic infection = yes (%)</b>     | 0 (0.0)    | 0 (0.0)    | -      | -       | 2 (0.7)    | 3 (0.3)    | -       | -       |
| <b>Parenteral nutrition = yes (%)</b>        | 1 (0.1)    | 1 (0.1)    | 0.0006 | 0.0021  | 0 (0.0)    | 0 (0.0)    | -       | -       |
| <b>Serious infection = yes (%)</b>           | 38 (4.3)   | 27 (3.1)   | 0.0632 | 0.0041  | 8 (2.8)    | 33 (3.4)   | 0.0336  | 0.0251  |
| <b>Bowel resection = yes (%)</b>             | 6 (0.7)    | 2 (0.2)    | 0.0670 | 0.0219  | 0 (0.0)    | 1 (0.1)    | 0.0453  | <0.0001 |
| <b>Nutritional anemia = yes (%)</b>          | 3 (0.3)    | 3 (0.3)    | 0.0011 | 0.1081  | 1 (0.3)    | 4 (0.4)    | 0.0097  | 0.0446  |
| <b>Electrolyte disorders = yes (%)</b>       | 19 (2.2)   | 39 (4.5)   | 0.1318 | 0.0334  | 16 (5.6)   | 52 (5.3)   | 0.012   | 0.0334  |
| <b>Benzodiazepine Rx = yes (%)</b>           | 105 (12.0) | 127 (14.8) | 0.0818 | 0.1791  | 29 (10.1)  | 145 (14.8) | 0.1426  | 0.1650  |
| <b>Bisphosphonate Rx = yes (%)</b>           | 14 (1.6)   | 37 (4.3)   | 0.1604 | 0.0495  | 1 (0.3)    | 27 (2.8)   | 0.1959  | 0.1446  |
| <b>Statin = yes (%)</b>                      | 95 (10.9)  | 149 (17.3) | 0.1873 | 0.0786  | 48 (16.8)  | 261 (26.7) | 0.2425  | 0.0548  |
| <b>High dose vitamin D Rx = yes (%)</b>      | 110 (12.6) | 96 (11.2)  | 0.0432 | 0.192   | 25 (8.7)   | 97 (9.9)   | 0.0408  | 0.0816  |
| <b>Weight loss or malnutrition = yes (%)</b> | 11 (1.3)   | 11 (1.3)   | 0.0021 | 0.1429  | 5 (1.7)    | 7 (0.7)    | 0.0936  | 0.0356  |
| <b>Antibiotic Rx = yes (%)</b>               | 102 (11.7) | 91 (10.6)  | 0.0338 | 0.1136  | 15 (5.2)   | 116 (11.9) | 0.2386  | 0.0331  |
| <b>Herpes antiviral Rx = yes (%)</b>         | 18 (2.1)   | 15 (1.7)   | 0.0228 | 0.0895  | 6 (2.1)    | 25 (2.6)   | 0.0306  | 0.0076  |
| <b>Comorbidity score (%)</b>                 |            |            | 0.1775 | 0.0547  |            |            | 0.1765  | 0.1126  |



|                                                                                |            |            |        |        |            |            |        |         |
|--------------------------------------------------------------------------------|------------|------------|--------|--------|------------|------------|--------|---------|
| <b>0</b>                                                                       | 621 (71.0) | 534 (62.2) |        |        | 197 (68.9) | 608 (62.2) |        |         |
| <b>1</b>                                                                       | 171 (19.5) | 191 (22.2) |        |        | 63 (22.0)  | 206 (21.1) |        |         |
| <b>2-3</b>                                                                     | 70 (8.0)   | 110 (12.8) |        |        | 22 (7.7)   | 126 (12.9) |        |         |
| <b>4+</b>                                                                      | 13 (1.5)   | 24 (2.8)   |        |        | 4 (1.4)    | 37 (3.8)   |        |         |
| <b>AZA/ 6MP Rx = yes (%)</b>                                                   | 283 (32.3) | 326 (38.0) | 0.1177 | 0.1613 | 100 (35.0) | 336 (34.4) | 0.0121 | 0.1082  |
| <b>Budesonide use = yes (%)</b>                                                | 46 (5.3)   | 442 (51.5) | 1.1936 | 0.1841 | 13 (4.5)   | 139 (14.2) | 0.3366 | 0.1944  |
| <b>Fibrates Rx = yes (%)</b>                                                   | 20 (2.3)   | 34 (4.0)   | 0.0963 | 0.0563 | 2 (0.7)    | 19 (1.9)   | 0.1092 | 0.0876  |
| <b>Methotrexate Rx = yes (%)</b>                                               | 23 (2.6)   | 13 (1.5)   | 0.0784 | 0.0947 | 1 (0.3)    | 8 (0.8)    | 0.0616 | 0.0783  |
| <b>Metronidazole Rx = yes (%)</b>                                              | 176 (20.1) | 187 (21.8) | 0.0407 | 0.0801 | 43 (15.0)  | 233 (23.8) | 0.2241 | 0.0309  |
| <b>Narcotics Rx = yes (%)</b>                                                  | 348 (39.8) | 364 (42.4) | 0.0529 | 0.0864 | 81 (28.3)  | 375 (38.4) | 0.2146 | 0.0295  |
| <b>Quinolone Rx = yes (%)</b>                                                  | 139 (15.9) | 168 (19.6) | 0.0963 | 0.0826 | 31 (10.8)  | 188 (19.2) | 0.2367 | 0.1394  |
| <b>Pyoderma Gangrenosum = yes (%)</b>                                          | 3 (0.3)    | 2 (0.2)    | 0.0205 | 0.0032 | 0 (0.0)    | 3 (0.3)    | 0.0785 | <0.0001 |
| <b>Prednisone use = yes (%)</b>                                                | 239 (27.3) | 401 (46.7) | 0.4095 | 0.2805 | 120 (42.0) | 792 (81.1) | 0.8777 | 0.1407  |
| <b>PPI Rx = yes (%)</b>                                                        | 310 (35.4) | 382 (44.5) | 0.1854 | 0.1621 | 95 (33.2)  | 407 (41.7) | 0.1751 | 0.1042  |
| <b>Number of non-IBD med classes during 183 days prior (%)</b>                 |            |            | 0.3522 | 0.2117 |            |            | 0.5069 | 0.1641  |
| <b>0-3</b>                                                                     | 306 (35.0) | 175 (20.4) |        |        | 108 (37.8) | 172 (17.6) |        |         |
| <b>4-6</b>                                                                     | 219 (25.0) | 218 (25.4) |        |        | 72 (25.2)  | 242 (24.8) |        |         |
| <b>7-10</b>                                                                    | 168 (19.2) | 219 (25.5) |        |        | 52 (18.2)  | 245 (25.1) |        |         |
| <b>10+</b>                                                                     | 182 (20.8) | 247 (28.8) |        |        | 54 (18.9)  | 318 (32.5) |        |         |
| <b>Number of IBD hospitalization days = none (%)</b>                           | 803 (91.8) | 759 (88.4) | 0.1143 | 0.0584 | 270 (94.4) | 828 (84.7) | 0.3200 | 0.0469  |
| <b>Number of non IBD hospitalizations = 1+ (%)</b>                             | 63 (7.2)   | 87 (10.1)  | 0.1042 | 0.0913 | 20 (7.0)   | 96 (9.8)   | 0.1022 | 0.0397  |
| <b>First drug that qualified patient into steroids or anti-TNF cohorts (%)</b> |            |            | -      | -      |            |            | -      | -       |
| <b>Adalimumab</b>                                                              | 699 (79.9) | 0 (0.0)    |        |        | 206 (72.0) | 0 (0.0)    |        |         |
| <b>Prednisone</b>                                                              | 0 (0.0)    | 343 (39.9) |        |        | 0 (0.0)    | 825 (84.4) |        |         |
| <b>Infliximab</b>                                                              | 120 (13.7) | 0 (0.0)    |        |        | 79 (27.6)  | 0 (0.0)    |        |         |
| <b>Budesonide</b>                                                              | 0 (0.0)    | 516 (60.1) |        |        | 0 (0.0)    | 152 (15.6) |        |         |
| <b>Certolizumab Pegol</b>                                                      | 56 (6.4)   | 0 (0.0)    |        |        | 1 (0.3)    | 0 (0.0)    |        |         |

TNF = new anti-TNF users; CS = prolonged CS users
